# Supplementary material for: In silico and in vitro analysis of salt stress tolerance by Selenium application in proso millet
Source: Research Square preprint supplement (doi:10.21203/rs.3.rs-1457017/v1), 2022-03-22
Supplement: Supplementary file 1 [file 45fd76e199e0d7bad5a80433.docx]

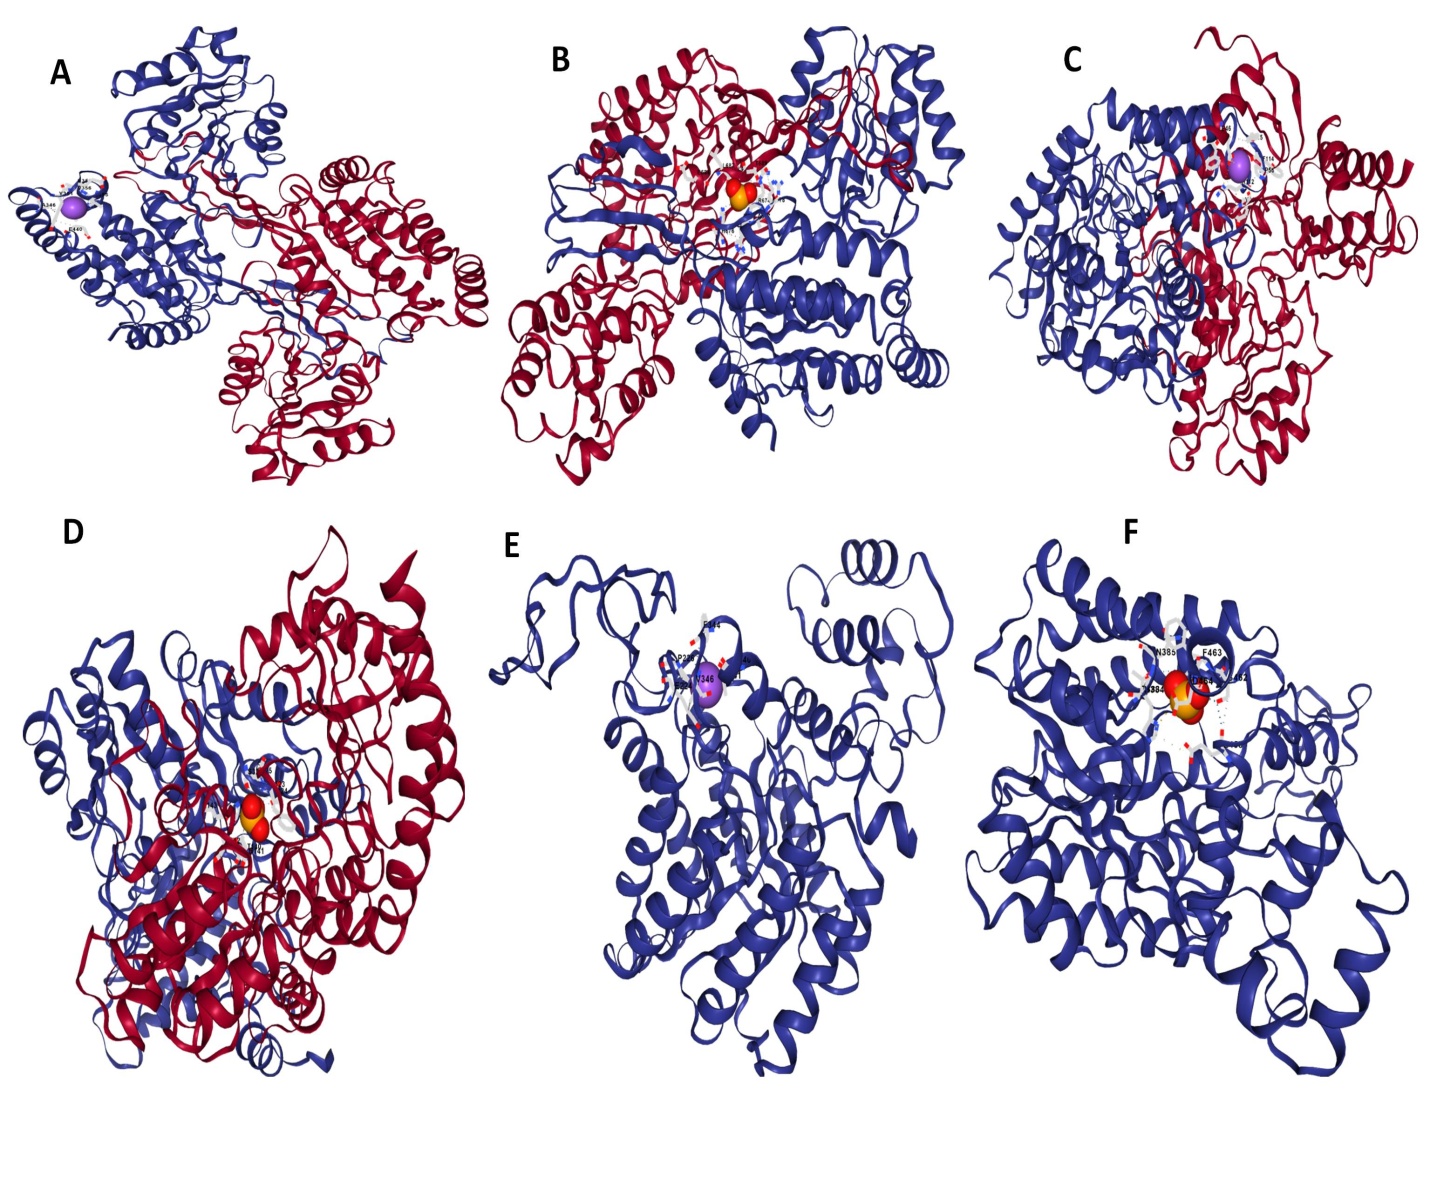


**Supplementary Fig. 1: Molecular docking structures: (A) *P5CS* with salt (B) *P5CS* with Se (C) *OAT* with salt (D) *OAT*  with Se (E) *ProDH* with salt (F) *ProDH*  with Se.**
